# Supplementary material for: IgG Expression upon Oral Sensitization in Association with Maternal Exposure to Ovalbumin
Source: PLOS journal article supplement (doi:10.1371/journal.pone.0148251), 2016-02-04
Supplement: S1 (10.1371/journal.pone.0148251.s001) [file journal.pone.0148251.s001]

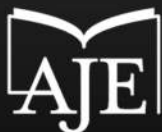

# EDITORIAL CERTIFICATE

This document certifies that the manuscript listed below was edited for proper English language, grammar, punctuation, spelling, and overall style by one or more of the highly qualified native English speaking editors at American Journal Experts.

## Manuscript title:

The expression of IgG upon oral sensitization in association with maternal exposure with ovalbumin

## Authors:

Ruchen Chen, Xiaoqiao Tang, Bolin Fan, Jiafa Liu, Xudong Jia, Xiaoguang Yang

## Date Issued:

August 27, 2015

## Certificate Verification Key:

C3F7-8582-680F-E06C-334B

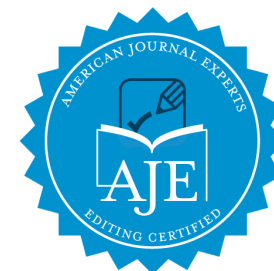

This certificate may be verified at [www.aje.com/certificate](http://www.aje.com/certificate). This document certifies that the manuscript listed above was edited for proper English language, grammar, punctuation, spelling, and overall style by one or more of the highly qualified native English speaking editors at American Journal Experts. Neither the research content nor the authors' intentions were altered in any way during the editing process. Documents receiving this certification should be English-ready for publication; however, the author has the ability to accept or reject our suggestions and changes. To verify the final AJE edited version, please visit our verification page. If you have any questions or concerns about this edited document, please contact American Journal Experts at [support@aje.com](mailto:support@aje.com).
